# Supplementary material for: A curing system of benzoxazine with amine: reactivity, reaction mechanism and material properties
Source: Royal Society of Chemistry journal article supplement (doi:10.1039/c4ra16582a), 2015-01-01
Supplement: c4ra16582a1.pdf [file c4ra16582a1.pdf]

## Supporting Information

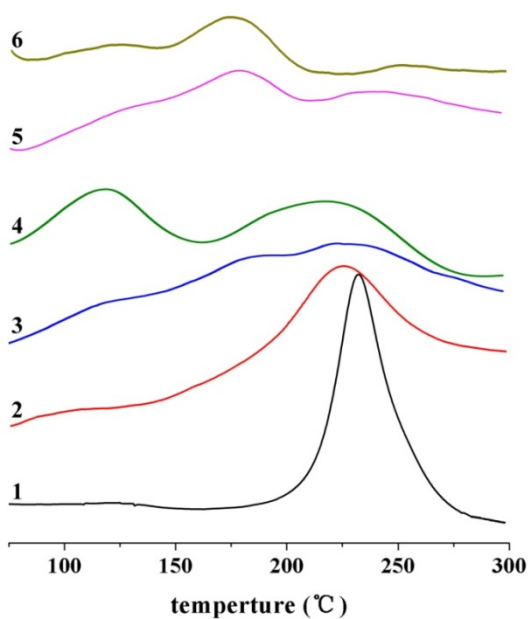

Fig.SI 1. DSC curves of the reactive BA-a/A1 mixtures of a variety of molar ratios: (1) without A1, (2) 1:0.25, (3) 1:0.5, (4) 1:1, (5) 1:2, and (6) 1:4.

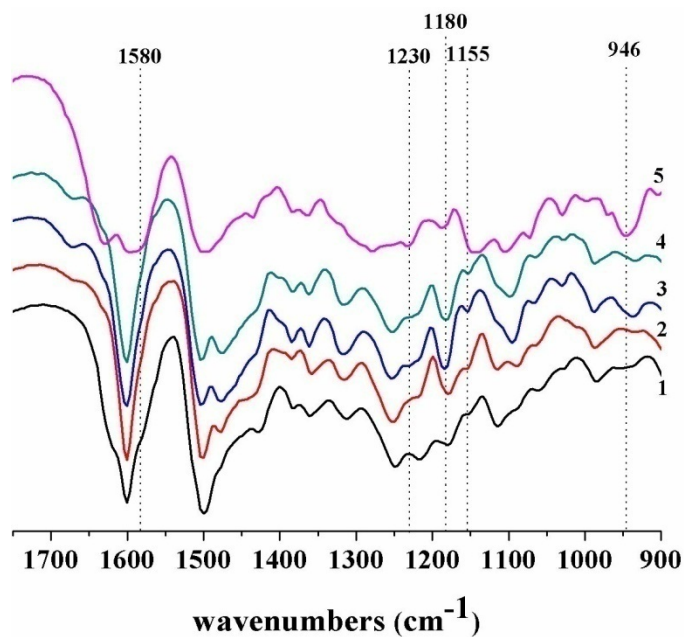

Fig.SI 2. FTIR spectra of the reactive BA-a mixtures with amines (1) A1, (2) A2, (3) A3, (4) A4, and (5) A5, heated at 100 °C for 60 minutes.

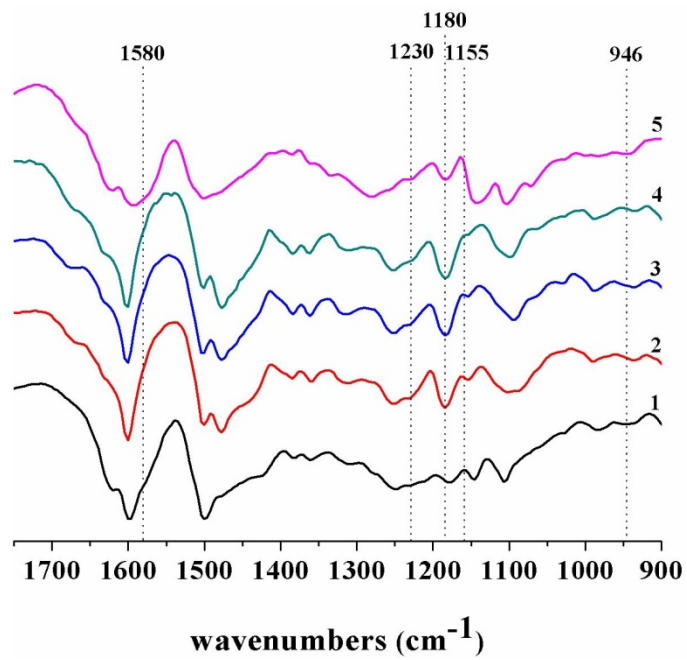

Fig.SI 3. FTIR spectra of the reactive BA-a mixtures with amines (1) A1, (2) A2, (3) A3, (4) A4, and (5) A5, heated at 120 °C and 150 °C for 2 h, respectively.

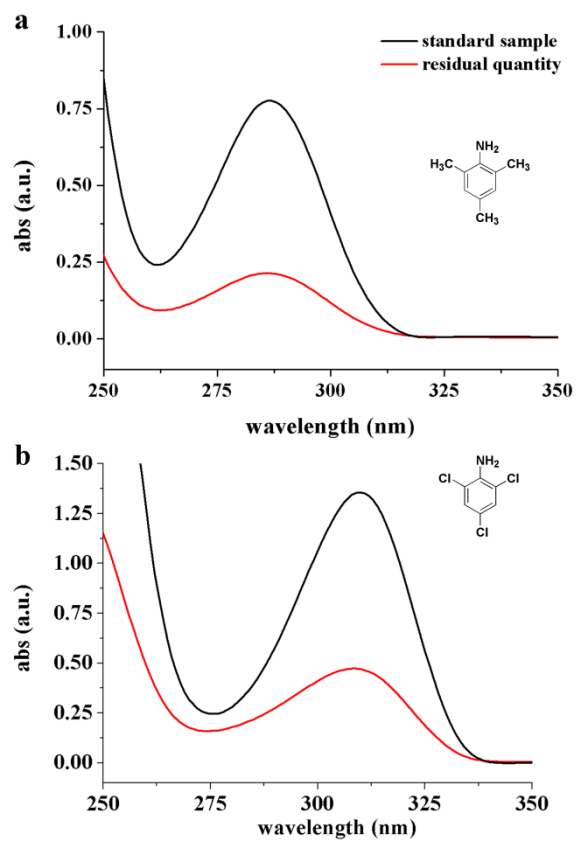

Fig.SI 4. UV-vis absorption spectra of the residual quantity of amines. (a) 2,4,6-Trimethylaniline, and (b) 2,4,6-Trichloroaniline. (the residual amines in the completely amine cured benzoxazine resins were extracted with methanol in a Soxhlet extractor.)

TableSI 1 Relative viscosity and reaction activity of benzoxazine/amine curing systems at different temperatures

| Curing system | 120 °C            |                                                      | 150 °C            |                                        |
|---------------|-------------------|------------------------------------------------------|-------------------|----------------------------------------|
|               | Gel time<br>(min) | Reaction activity (min <sup>-1</sup> ) <sup>1)</sup> | Gel time<br>(min) | Reaction activity (min <sup>-1</sup> ) |
| pure BA-a     | 364               | 2.75×10 <sup>-3</sup>                                | 189               | 5.29×10 <sup>-3</sup>                  |
| BA-a/A1       | 11                | 9.09×10 <sup>-2</sup>                                | 3                 | 3.33×10 <sup>-2</sup>                  |
| BA-a/A2       | 36                | 2.78×10 <sup>-2</sup>                                | 10                | 1.00×10 <sup>-2</sup>                  |
| BA-a/A3       | 63                | 1.59×10 <sup>-2</sup>                                | 15                | 6.67×10 <sup>-2</sup>                  |
| BA-a/A4       | 33                | 3.03×10 <sup>-2</sup>                                | 12                | 8.33×10 <sup>-2</sup>                  |
| BA-a/A5       | 81                | 1.23×10 <sup>-2</sup>                                | 33                | 3.03×10 <sup>-2</sup>                  |

TableSI 2 Thermal properties of benzoxazine /amine curing systems.

| Curing system | T <sub>5%</sub> (°C) <sup>a</sup> | T <sub>10%</sub> (°C) <sup>b</sup> | T <sub>max</sub> (°C) <sup>c</sup> | Y <sub>c</sub> (%) <sup>d</sup> |
|---------------|-----------------------------------|------------------------------------|------------------------------------|---------------------------------|
| pure BA-a     | 293                               | 331                                | 394                                | 35                              |
| BA-a/A1       | 278                               | 335                                | 377                                | 43                              |
| BA-a/A2       | 272                               | 289                                | 412                                | 38                              |
| BA-a/A3       | 251                               | 266                                | 407                                | 19                              |
| BA-a/A4       | 267                               | 281                                | 409                                | 20                              |
| BA-a/A5       | 318                               | 351                                | 438                                | 35                              |

<sup>a</sup> T<sub>5%</sub>: The temperature for which the weight loss is 5%;

<sup>b</sup> T<sub>10%</sub>: The temperature for which the weight loss is 10%;

<sup>c</sup> T<sub>ma</sub>: The temperature for maximum weight loss; <sup>d</sup> Y<sub>c</sub>: Char yields at 800 °C under nitrogen atmosphere.

Table SI 3. The values of  $T_g$ ,  $E'$  and  $\rho$  of benzoxazine /amine curing systems.

| Sample    | $T_g$ (°C) | $E'$ (MPa) |           | $\rho$ (mol•m <sup>-3</sup> ) <sup>a</sup> |
|-----------|------------|------------|-----------|--------------------------------------------|
|           |            | 50 °C      | $T_g+ 50$ |                                            |
| pure BF-a | 185        | 5182       | 1269      | 0.100                                      |
| BF-a/A1   | 160        | 4914       | 1735      | 0.144                                      |
| BF-a/A2   | 86         | 5400       | 1289      | 0.126                                      |
| BF-a/A3   | 105        | 4749       | 1081      | 0.101                                      |
| BF-a/A4   | 90         | 4066       | 1605      | 0.156                                      |
| BF-a/A5   | 169        | 2759       | 385       | 0.031                                      |

<sup>a</sup> crosslinking density was calculated by the modified Nealsen equation (modification of the Flory's rubber elasticity theory).
